# Supplementary material for: Plasma Metabolomics for Discovery of Early Metabolic Markers of Prostate Cancer Based on Ultra-High-Performance Liquid Chromatography-High Resolution Mass Spectrometry
Source: MDPI journal article supplement (doi:10.3390/cancers13133140), 2021-06-23
Supplement: s1 [file s1]

## Reagents and Chemicals used for the samples preparation and the UHPLC-HRMS Metabolomic Analysis

HPLC grade solvent (acetonitrile, methanol) and formic acid were purchased from Merck KGaA (Darmstadt, Germany). Ultrapure water (H<sub>2</sub>O) was collected from a Milli-Q system (Millipore, Billerica, MA). Internal Standards (ISs), Carnitine C8:0-d3, Carnitine C16:0-d3, FFA C18:0-d3, CA-d4, CDCA-d5, Phe-d5, and Trp-d5 were purchased from Cambridge Isotope (Tewksbury, MA); FFA C16:0-d3 was purchased from C/D/N Isotopes Inc. (Pointe-Claire, Québec), and LPC 19:0 was supplied by Avanti Polar Lipids (Alabaster, AL).

**Supplemental Table S1.** Internal Standards (ISs) and concentration.

| Internal Standards (ISs) | Concentration in extraction solvent (ug/mL) |
|--------------------------|---------------------------------------------|
| Carnitine C2:0-d3        | 0.16                                        |
| Carnitine C10:0-d3       | 0.10                                        |
| Carnitine C16:0-d3       | 0.15                                        |
| LPC 19:0                 | 0.75                                        |
| FFA C16:0-d3             | 2.50                                        |
| FFA C18:0-d3             | 2.50                                        |
| CA-d4                    | 1.85                                        |
| CDCA-d4                  | 1.49                                        |
| Leu-d3                   | 5.00                                        |
| Val-d8                   | 4.00                                        |
| Phe-d5                   | 3.61                                        |
| Trp-d5                   | 4.25                                        |

**Supplemental Table S2.** Important metabolites in the discrimination of participants who developed PCa during the follow-up from controls selected by sPLS-DA.

| <b>Metabolites</b> | <b>m/z</b> | <b>Rt</b> | <b>FC</b> | <b>p-value</b> | <b>Adj. p-value</b> | <b>FDR</b> |
|--------------------|------------|-----------|-----------|----------------|---------------------|------------|
| Eicosadienoic acid | 309.2776   | 6.04      | 0.18      | 1.43E-05       | 3.07E-03            | 4.38E-04   |
| Ethyl oleate       | 311.2928   | 6.97      | 0.41      | 5.12E-05       | 1.10E-02            | 1.37E-03   |
| Phosphate          | 98.9843    | 0.41      | 0.09      | 1.02E-05       | 2.19E-03            | 4.38E-04   |
| Tiglyl carnitine   | 244.1539   | 1.31      | -0.10     | 6.31E-04       | 1.35E-01            | 1.35E-02   |
| L-glutamic acid    | 148.0609   | 0.38      | -0.19     | 6.75E-11       | 1.44E-08            | 7.22E-09   |
| Serotonin          | 177.1022   | 0.48      | -0.25     | 1.30E-08       | 2.78E-06            | 6.96E-07   |
| 2-hydroxyadenine   | 152.0567   | 0.39      | -0.24     | 8.77E-10       | 1.88E-07            | 6.25E-08   |
| 7-Keto cholesterol | 401.3407   | 5.96      | -0.10     | 1.01E-04       | 2.16E-02            | 2.40E-03   |
| Sphinganine        | 302.3046   | 3.64      | -0.33     | 8.88E-16       | 1.90E-13            | 1.90E-13   |
| Sphingosine        | 300.2902   | 3.51      | -0.21     | 1.21E-05       | 2.60E-03            | 4.33E-04   |

m/z: detected mass; Rt, retention time (in minutes); FC, fold change; FDR, false discovery rate; p-value were computed by using Multiple Experiment Viewer (MeV\_4\_9\_0\_r2731\_win); Adj. p-value, p-value with Bonferroni adjustment.

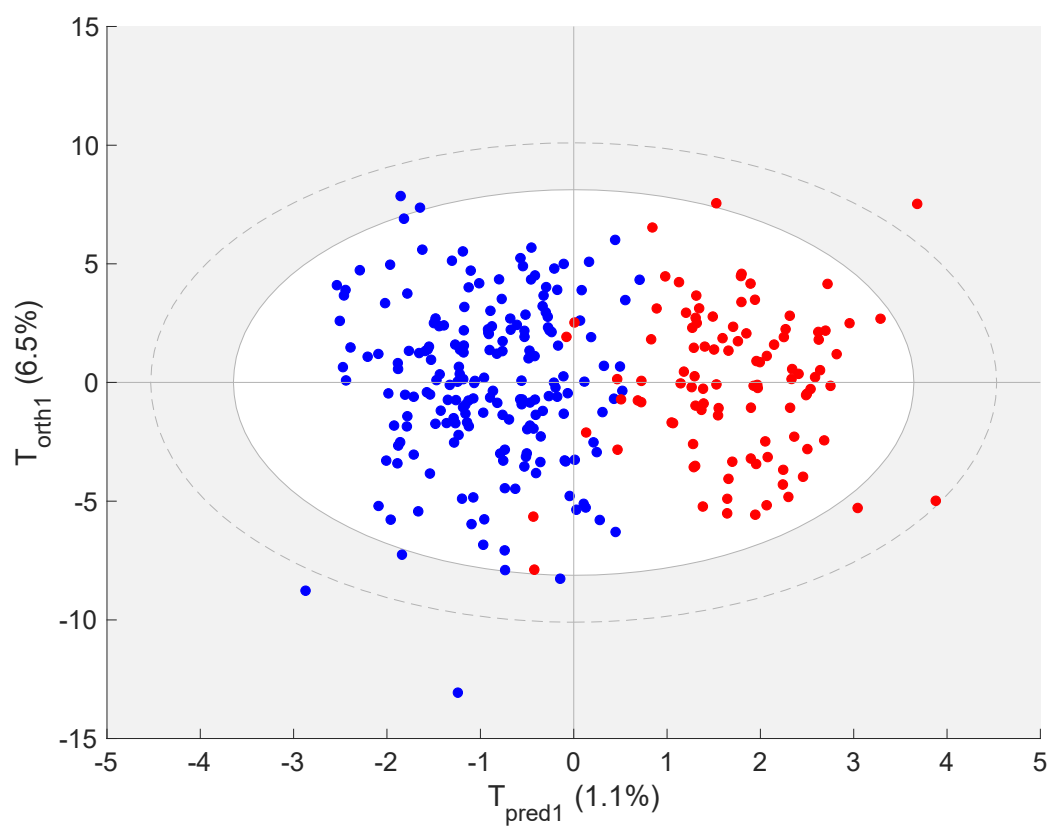

**Supplemental Figure S1.** Score plot of OPLS-DA model for the Discovery cohort.

Prostate cancer cases (n=102, red circle), matched controls (n=190, blue circle).

Components: 1(predictive) + 4(orthogonal); R<sup>2</sup>: 0.73, Q<sup>2</sup>cum: 0.48.

### ROC curve of OPLS-DA model validation

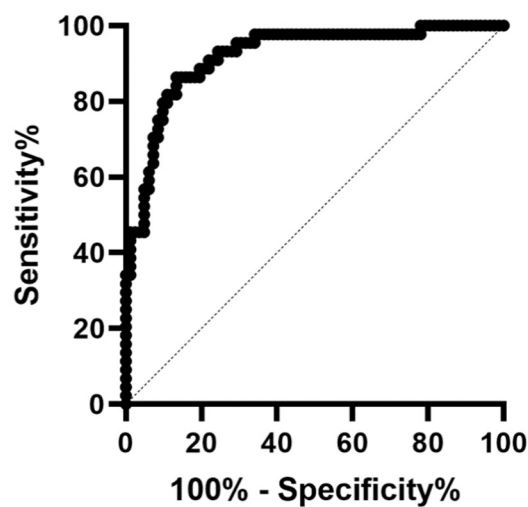

**Supplemental Figure S2.** AU-ROC for the OPLS-DA model validation.

The OPLS-DA model from the discovery cohort was validated by prediction of samples in the validation cohort (remaining 30% of all samples, PCa cases:  $n = 44$  / Controls:  $n = 82$ ). AU-ROC: 0.92 (Sensitivity: 86.36%; Specificity: 86.59%), 95% confidence interval (0.87, 0.97), P value:  $< 0.0001$ .

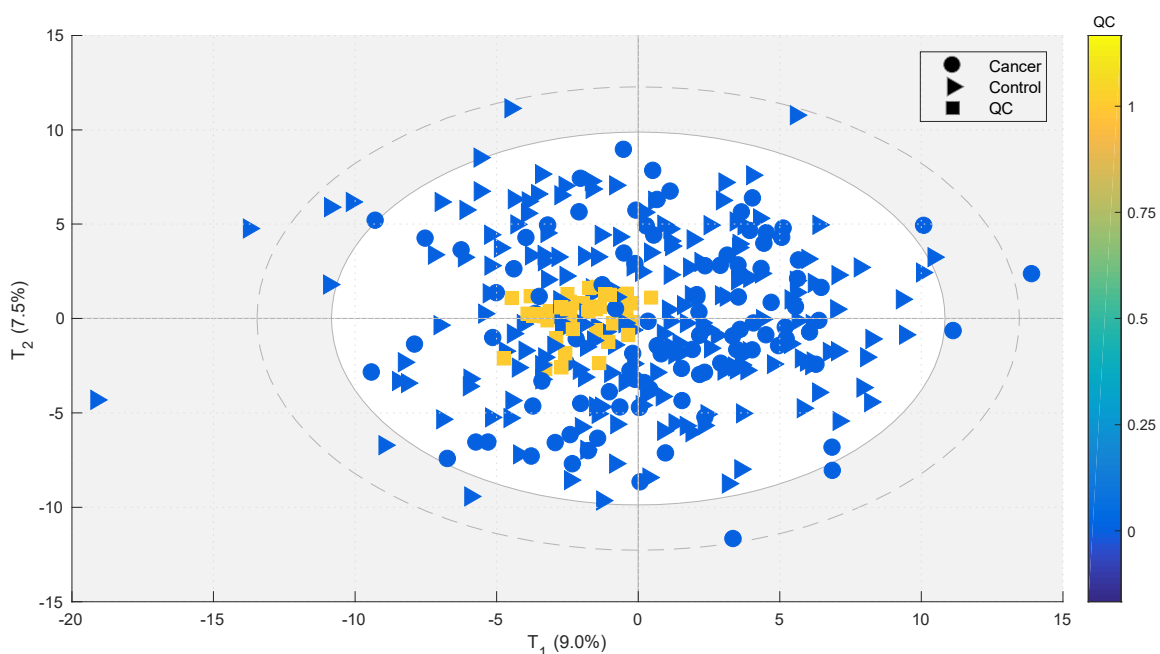

**Supplemental Figure S3.** Score plot of PCA with QC samples (highlighted).
